# Supplementary material for: CD54-Mediated Interaction with Pro-inflammatory Macrophages Increases the Immunosuppressive Function of Human Mesenchymal Stromal Cells
Source: PubMed Central journal article supplement — Stem Cell Reports. 2017 Mar 16;8(4):961–76. doi: 10.1016/j.stemcr.2017.02.008 (PMC5390105; doi:10.1016/j.stemcr.2017.02.008), 2017-03-16
Supplement: mmc1.pdf [file mmc1.pdf]

**Stem Cell Reports, Volume 8**

**Supplemental Information**

**CD54-Mediated Interaction with Pro-inflammatory Macrophages Increases the Immunosuppressive Function of Human Mesenchymal Stromal Cells**

**Nicolas Espagnolle, Adélie Balguerie, Emmanuelle Arnaud, Luc Sensebé, and Audrey Varin**

**A**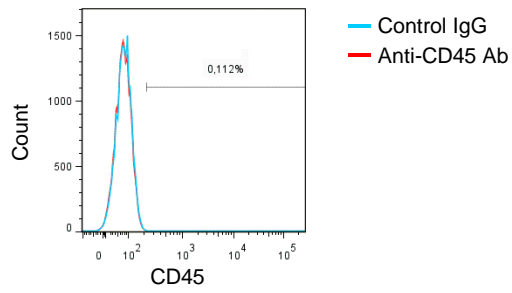**B**

| Markers | % of expression |
|---------|-----------------|
| CD90    | 99.7 ± 0.47     |
| CD73    | 98.1 ± 1,9      |
| CD146   | 23.4 ± 13.6     |
| CD31    | 1.3 ± 1.2       |
| CD45    | 0.3 ± 0.2       |

**Figure S1: Phenotype of mesenchymal stromal cells.**

The MSCs used for the experiment did not expressed the CD45 (histogram and table) and the CD31 but are positives for CD90 and CD73 (3 independent experiments).

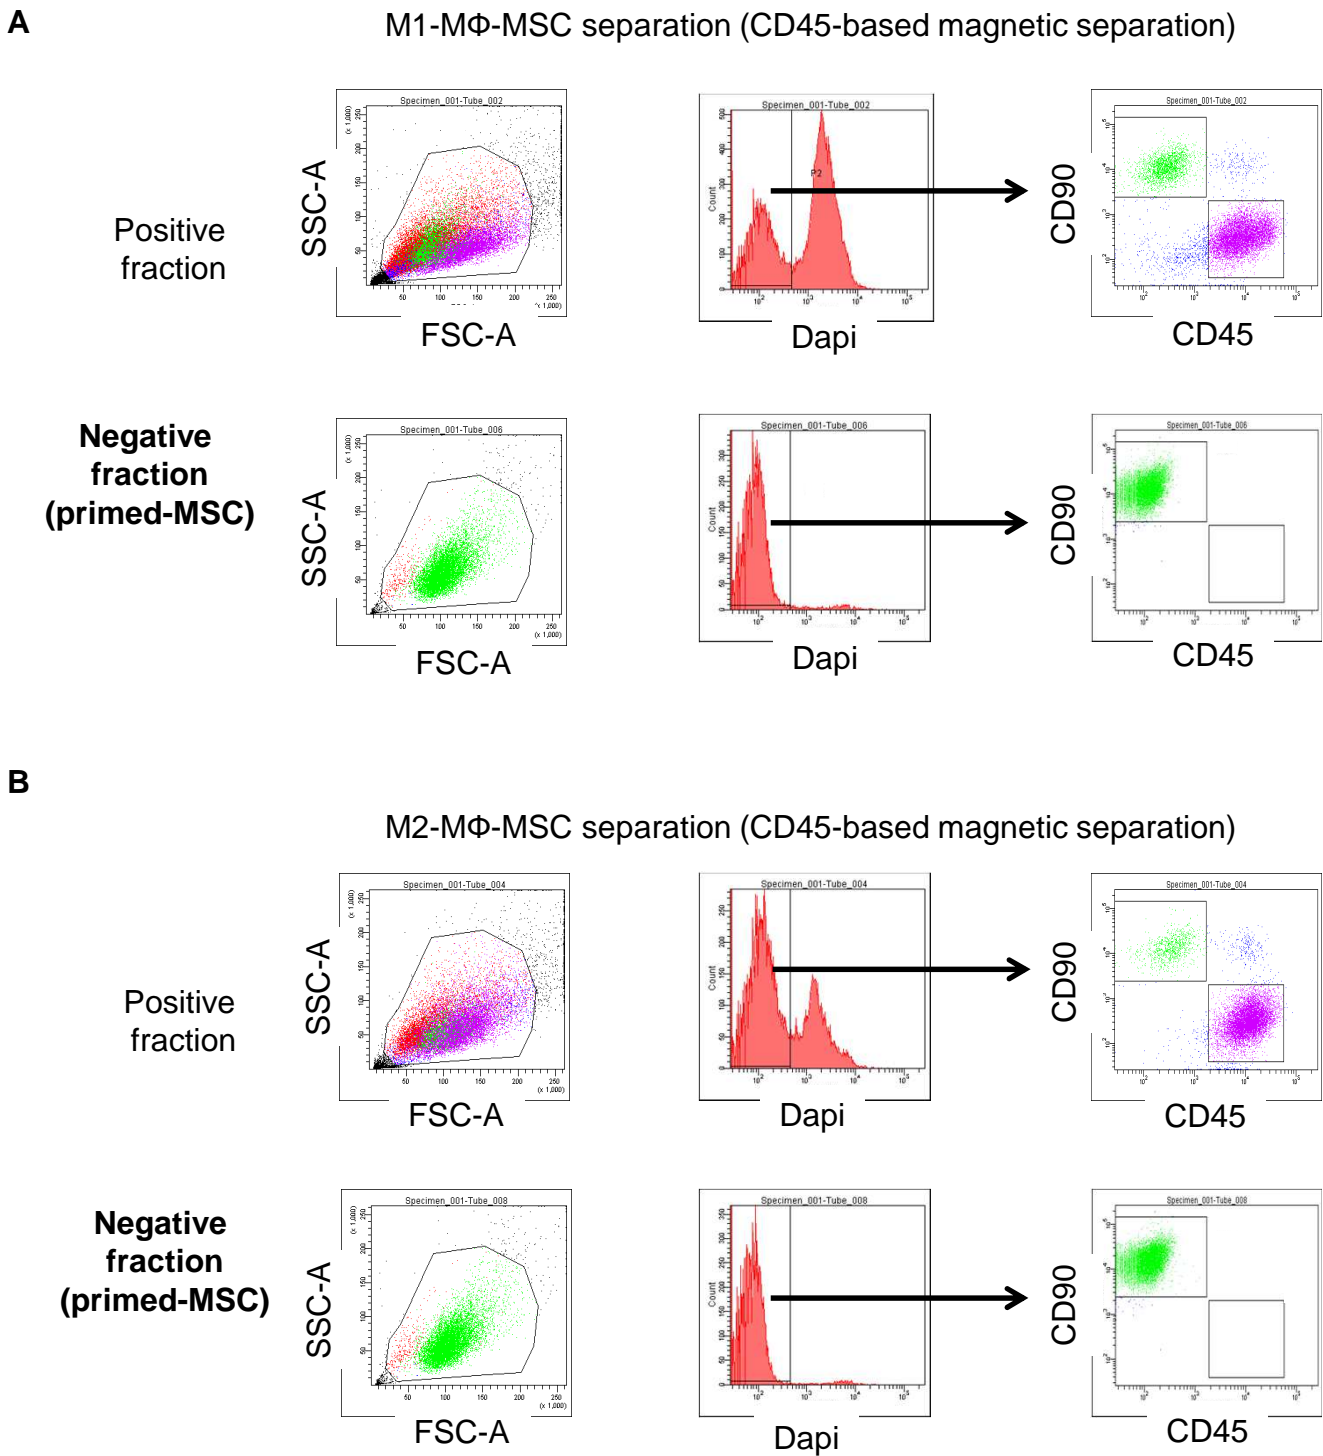

**Figure S2: MSC sorting after co-culture with M1M $\Phi$  or M2M $\Phi$  macrophages**

After 24 h of co-culture between M1M $\Phi$  (A) or M2M $\Phi$  (B) and MSCs, cells were harvested and MSCs were magnetically separated from macrophages. Viability and purity of positive and negative fraction was determined by DAPI labelling and staining with anti-CD90-FITC/anti-CD45 APC Vio770 antibodies.

A

| Gene Symbol       | RefSeq          | Fold-Change<br>(M1-MSC vs. MSC) | p-value<br>(M1-MSC vs. MSC) | Fold-Change<br>(M2-MSC vs. MSC) | p-value<br>(M2-MSC vs. MSC) |
|-------------------|-----------------|---------------------------------|-----------------------------|---------------------------------|-----------------------------|
| <i>CXCL9</i>      | NM_002416       | 91,36                           | 2,2E-08                     | 1,02                            | 0,90                        |
| <i>CXCL10</i>     | NM_001565       | 31,13                           | 1,5E-06                     | -1,03                           | 0,91                        |
| <i>CD54</i>       | NM_000201       | 8,52                            | 7,3E-04                     | 1,47                            | 0,31                        |
| <i>PD-L1</i>      | NM_014143       | 6,76                            | 1,1E-03                     | 1,03                            | 0,93                        |
| <i>IDO1</i>       | NM_002164       | 5,93                            | 1,4E-05                     | 1,19                            | 0,31                        |
| <i>IL6</i>        | NM_000600       | 5,67                            | 1,3E-03                     | 1,73                            | 0,13                        |
| <i>VEGFA</i>      | NM_001025366    | 4,79                            | 8,0E-03                     | 1,03                            | 0,94                        |
| <i>TSG6</i>       | NM_007115       | 4,32                            | 7,8E-03                     | -1,03                           | 0,93                        |
| <i>CD106</i>      | NM_001078       | 3,31                            | 1,2E-03                     | 2,37                            | 0,00                        |
| <i>HLA-G5</i>     | NM_002127       | 1,37                            | 2,6E-02                     | -1,01                           | 0,93                        |
| <i>GALECTIN 9</i> | NM_009587       | 1,95                            | 8,6E-02                     | 1,06                            | 0,85                        |
| <i>CD40</i>       | NM_001250       | 1,52                            | 5,6E-02                     | -1,03                           | 0,85                        |
| <i>TGFB1</i>      | NM_000660       | 1,14                            | 3,9E-01                     | -1,07                           | 0,62                        |
| <i>GALECTIN 1</i> | NM_002305       | -1,12                           | 1,4E-01                     | 1,07                            | 0,34                        |
| <i>HMOX1</i>      | NM_002133       | -1,12                           | 5,9E-01                     | -1,69                           | 0,03                        |
| <i>COX2</i>       | ENST00000361739 | -1,32                           | 8,7E-02                     | -1,06                           | 0,68                        |
| <i>CD58</i>       | NM_001779       | -1,46                           | 1,6E-01                     | 1,15                            | 0,57                        |
| <i>GALECTIN 3</i> | NR_003225       | -1,49                           | 1,1E-03                     | -1,12                           | 0,14                        |
| <i>CD86</i>       | NM_175862       | 1,23                            | 5,9E-01                     | 1,31                            | 0,46                        |
| <i>CD80</i>       | NM_005191       | 1,21                            | 9,3E-02                     | 1,06                            | 0,56                        |
| <i>CCL8</i>       | NM_005623       | 2,26                            | 3,2E-03                     | 1,13                            | 0,51                        |
| <i>IL1B</i>       | NM_000576       | -1,01                           | 8,9E-01                     | 1,03                            | 0,66                        |
| <i>CD72</i>       | NM_001782       | -1,04                           | 7,9E-01                     | -1,15                           | 0,29                        |
| <i>CXCR7</i>      | NM_020311       | 1,03                            | 9,2E-01                     | -1,50                           | 0,12                        |
| <i>ICAM2</i>      | NM_001099786    | -1,13                           | 4,0E-01                     | 1,08                            | 0,54                        |
| <i>CCL1</i>       | NM_002981       | -1,12                           | 3,1E-01                     | -1,03                           | 0,77                        |
| <i>IL10</i>       | NM_000572       | -1,13                           | 3,3E-02                     | -1,09                           | 0,10                        |

B

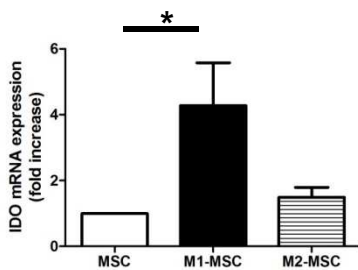

C

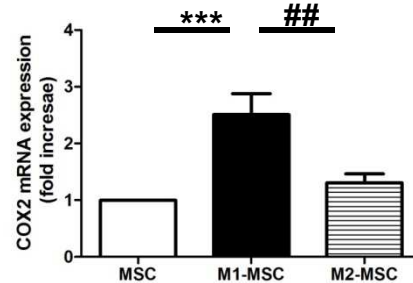

D

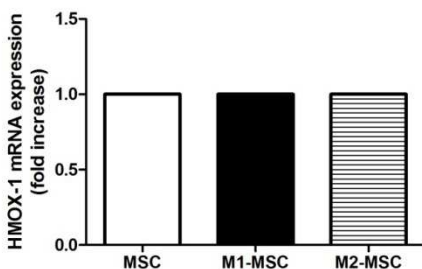

E

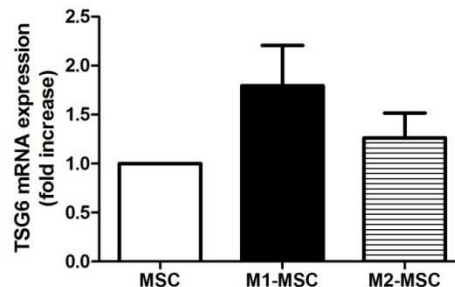

**Figure S3: RNA expression of immunosuppressive molecules.** MSCs were co-cultured with or without M1MΦ or M2MΦ for 24 h, then harvested, magnetically separated from macrophages and cultivated for 24 h. (A) Microarray analysis of Expression of genes coding for proteins involved in immunosuppression by M1MΦ- and M2MΦ-primed MSCs as compared with unprimed MSCs (Figure related to Figure 1). qPCR analysis of mRNA expression of *IDO* (B), *COX2* (C), *HMOX1* (D) and *TSG6* (E). Data are mean fold increase in expression  $\pm$ SEM (5 independent experiments). \*\*P<0.01, \*\*\*P<0.001, compared with MSCs. ##P<0.01.

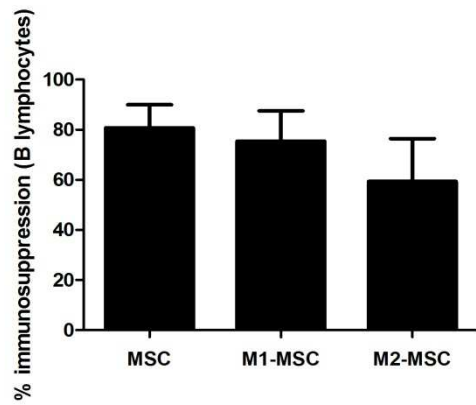

**Figure S4 M $\Phi$  priming of MSC did not modify B-lymphocyte proliferation.**

MSCs were unprimed or primed for 24 h with M1M $\Phi$  or M2M $\Phi$ . After separation, MSCs were added to CFSE-labelled B lymphocytes and stimulated with CpG for 7 days. Data are mean percentage immunosuppression  $\pm$  SEM (3 independent experiments).

### **Supplemental experimental procedure**

*B lymphocyte immunosuppression:* human B cells were isolated from PBMCs by using the B-cell isolation kit II (Miltenyi) and labeled with CFSE (2.5  $\mu$ M, 10 min at 37 °C) (Life Technologies) according to the manufacturer's guidelines.  $10^5$ -labeled B lymphocytes were plated alone as a positive control or with MSCs (ratio 1:1) and stimulated with 2  $\mu$ g/mL CpG (InvivoGen) for 7 days. B lymphocytes were harvested and stained with anti-CD45-APC-Vio770 and anti-CD19-APC (BD) antibodies and fluorescence was analyzed on a FACS Canto II (BD) by using Diva software (BD). The proportion of immunosuppression induced by MSCs was calculated as  $[1 - (\text{proliferation of B cells co-cultured with MSCs}/\text{proliferation of stimulated B cells alone})] \times 100$ .

### **Supplemental movie legend (related to Figure 6)**

(n=nomarsky; f=fluorescence)

#### **Supplemental movie S1**

MSC alone (big adherent cells) don't exhibit calcium mobilization and keep a stable blue color in a pseudocolor scale.

#### **Supplemental movie S2**

In contact with M1 macrophages (adherent rounded cells), MSC increase calcium mobilization and exhibit a yellow color intermittently from a pseudocolor scale.

#### **Supplemental movie S3**

In contact with M2 macrophages (adherent rounded cells), MSC don't increase calcium mobilization and keep a blue color from a pseudocolor scale.

#### **Supplemental movie S4**

In presence of T cells (small migrating cells), MSC don't increase calcium mobilization and keep a stable blue-green color from a pseudocolor scale.

#### **Supplemental movie S5**

In contact with M1 macrophages, anti-CD54 pretreated MSC (in center and in right of movie) don't increase calcium mobilization and exhibit a stable blue color from a pseudocolor scale.
